# Supplementary material for: Ultrasensitive detection of disease biomarkers using an immuno-wall device with enzymatic amplification
Source: Royal Society of Chemistry journal article supplement (doi:10.1039/c9an00480g), 2019-01-01
Supplement: c9an00480g1.pdf [file c9an00480g1.pdf]

## Electronic Supplementary Information

### Ultrasensitive detection of disease biomarkers using an immuno-wall device with enzymatic amplification

*Keine Nishiyama,<sup>a</sup> Toshihiro Kasama,<sup>b,c</sup> Seiya Nakamata,<sup>a</sup> Koya Ishikawa,<sup>d</sup> Daisuke Onoshima,<sup>c,e</sup> Hiroshi Yukawa,<sup>c,d,e</sup> Masatoshi Maeki,<sup>f</sup> Akihiko Ishida,<sup>f</sup> Hirofumi Tani,<sup>f</sup> Yoshinobu Baba<sup>c,d,e</sup> and Manabu Tokeshi<sup>\*,c,e,f,g</sup>*

<sup>a</sup>Graduate School of Chemical Sciences and Engineering, Hokkaido University, Kita 13 Nishi 8, Kita-ku, Sapporo 060-8628, Japan

<sup>b</sup>Department of Bioengineering, School of Engineering, The University of Tokyo, Shinkawasaki, Saiwai-ku, Kawasaki-shi, Kanagawa, 212-0032, Japan

<sup>c</sup>ImPACT Research Center for Advanced Nanobiodevices, Nagoya University, Furo-cho, Chikusa-ku, Nagoya 464-8603, Japan

<sup>d</sup>Department of Biomolecular Engineering, Graduate School of Engineering, Nagoya University, Furo-cho, Chikusa-ku, Nagoya 464-8603, Japan

<sup>e</sup>Institute of Nano-Life-Systems, Institutes of Innovation for Future Society, Nagoya University, Furo-cho, Chikusa-ku, Nagoya 464-8603, Japan

<sup>f</sup>Division of Applied Chemistry, Faculty of Engineering, Hokkaido University, Kita 13 Nishi 8, Kita-ku, Sapporo 060-8628, Japan

<sup>g</sup>Innovative Research Centre for Preventive Medical Engineering, Nagoya University, Furo-cho Chikusa-ku, Nagoya 464-8603, Japan

Corresponding author: (M. Tokeshi) Phone: +81-11-706-6744; Fax: +81-11-706-6745; E-mail: tokeshi@eng.hokudai.ac.jp

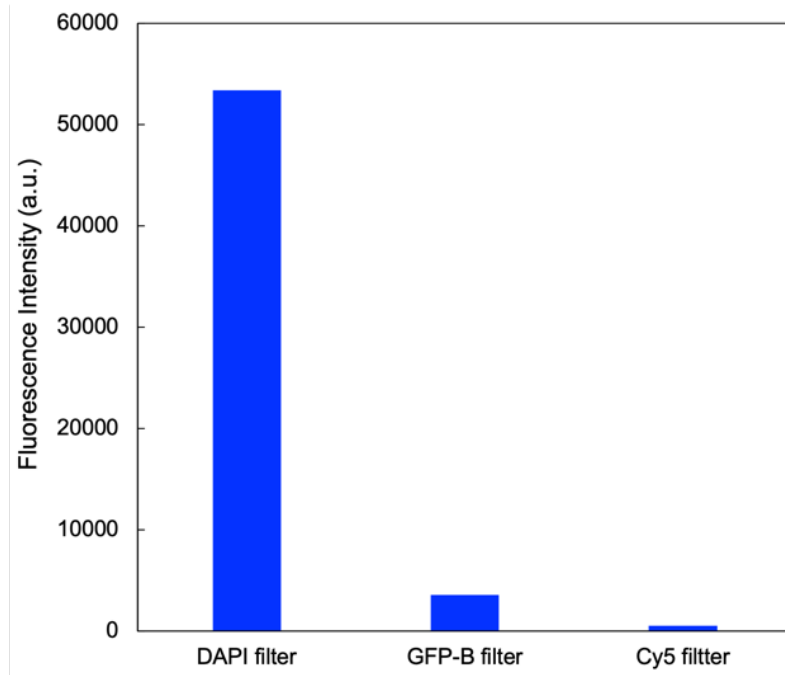

Fig. S1 Background signal of the immuno-wall obtained using various filters. Exposure time of the CCD camera was 1 s for all filters.

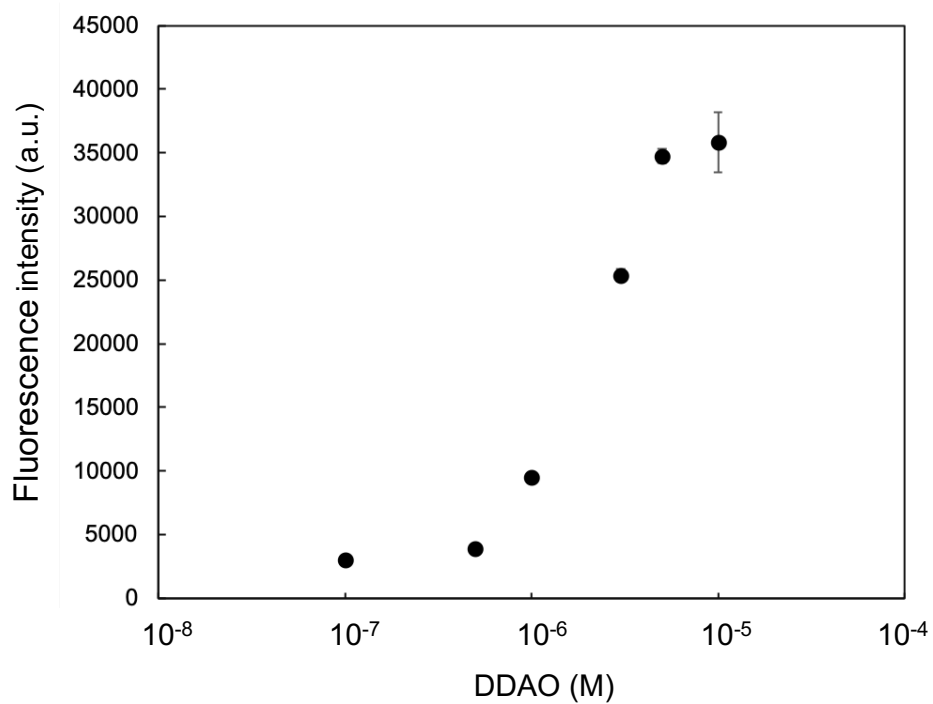

Fig. S2 Calibration curves of 9H-(1,3-dichloro-9,9-dimethylacridin-2-one-7-yl) (DDAO) in a microchannel without the immuno-wall. Exposure time of the CCD camera was 5 s.

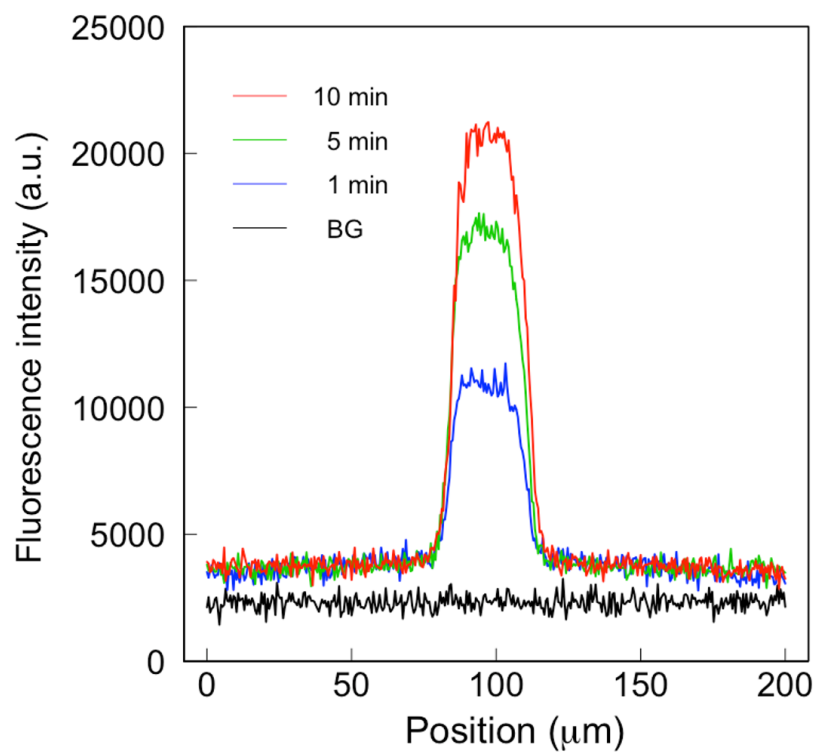

Fig. S3 Fluorescence intensity profile as a function of the position with injection of 0.5  $\mu\text{M}$  DDAO.

Exposure time of the CCD camera was 5 s.

Table S1 Analytical performance of correlative devices for C-reactive protein (CRP) detection

| Method                                                                            | LOD <sup>a</sup>  | Assay time (min) | Sample volume (μL) | Ref.             |
|-----------------------------------------------------------------------------------|-------------------|------------------|--------------------|------------------|
| Immunoassay on a power-free microchip                                             | 17 pg/mL          | 23               | 0.5                | (38)             |
| Surface plasmon resonance-based immunoassay                                       | 1.2 ng/mL         | 5                | 50                 | (39)             |
| Label-free immunoassay based on electron transfer                                 | 40 pg/mL          | 50               | 10                 | (40)             |
| Paper-based device                                                                | 5.0 μg/mL         | 22               | 0.5                | (41)             |
| Nanoribbon sensors using a miniature bead-based enzyme-linked immunosorbent assay | 50 pg/mL          | 60               | 10                 | (42)             |
| Graphene/polyethylene glycol hybrids for single-step immunoassay microdevice      | 400 ng/mL         | 2                | -                  | (43)             |
| <b>Immuno-wall device (Fluorescence-label)</b>                                    | <b>1.7 ng/mL</b>  | <b>16</b>        | <b>0.25</b>        | <b>This work</b> |
| <b>Immuno-wall device (Enzyme-label)</b>                                          | <b>2.5 pg/ mL</b> | <b>46</b>        | <b>0.25</b>        | <b>This work</b> |

<sup>a</sup> LOD, limit of detection
